# Supplementary material for: The interleukin-4/PPARγ signaling axis promotes oligodendrocyte differentiation and remyelination after brain injury
Source: PLoS Biol. 2019 Jun 21;17(6):e3000330. doi: 10.1371/journal.pbio.3000330 (PMC6608986; doi:10.1371/journal.pbio.3000330)
Supplement: S2 Table — DEG, differentially expressed gene; IL-4, interleukin-4. (XLSX) [file pbio.3000330.s012.xlsx]

## Sheet: down
Table S2. Differentially Expressed Genes (DEGs) downregulated in oligodendrocyte progenitor cells by IL-4 treatment.
Gene ID	Gene Symbol	Fold Change	P Value	FDR
TC0600001407.rn.2	Serpina3n	-60.8	1.35e-06	0.0002
TC0200004002.rn.2	Fcrl2	-33.45	5.74e-07	8.98e-05
TC0100000231.rn.2	Enpp3	-16.72	8.6e-06	0.0004
TC0X00002065.rn.2	Itm2a	-14.71	2.64e-09	2.45e-06
TC1100000678.rn.2	Casr	-14.19	1.31e-05	0.0005
TC1700001880.rn.2	Amph	-13.15	1.36e-10	2.63e-07
TC1400001444.rn.2	Anxa3	-10.76	8.28e-07	0.0001
TC0100004935.rn.2	Apoe	-9.33	1.51e-07	3.85e-05
TC0100003887.rn.2	Pnlip	-8.93	6.52e-05	0.0013
TC1400002457.rn.2	Tgfbr3	-8.21	8.76e-06	0.0004
TC0200001181.rn.2	Mab21l1	-7.77	7.27e-05	0.0014
TC0400001545.rn.2	Grm7	-7.33	0.0001	0.0021
TC0700001564.rn.2	Parvb	-6.75	4.06e-06	0.0003
TC0800000662.rn.2	Tmprss5	-6.58	1.09e-05	0.0005
TC1000003428.rn.2	Ccl6	-6.51	7.01e-05	0.0013
TC0900000490.rn.2	Inpp4a	-6.09	4.4e-09	3.52e-06
TC0700003603.rn.2	Scube1	-5.64	0.0003	0.0036
TC1100001355.rn.2	Hlcs	-5.52	3.86e-08	1.74e-05
TC0200003266.rn.2	Fabp5	-5.39	4.53e-05	0.001
TC1300000811.rn.2	Aim2	-5.38	0.0001	0.0019
TC2000001604.rn.2	Man1a1	-5.37	5.46e-08	1.98e-05
TC0100003353.rn.2	Tmem2	-5.34	1.59e-06	0.0002
TC1000003241.rn.2	Serpinf1	-5.22	7.34e-07	0.0001
TC1000002643.rn.2	Nipal4	-5.09	2.04e-07	4.69e-05
TC1200000368.rn.2	Pcolce	-5	0.0001	0.0017
TC0900001092.rn.2	Ugt1a	-4.92	0.0033	0.0165
TC1400001322.rn.2	Spp1	-4.78	0.003	0.0153
TC0100006696.rn.2	Sephs2	-4.76	8.95e-07	0.0001
TC0600002133.rn.2	Vsnl1	-4.69	0.0012	0.0082
TC1500001092.rn.2	Gpc5	-4.68	9.7e-06	0.0004
TC1400001727.rn.2	LOC100910415	-4.6	2.97e-07	6.21e-05
TC1700000715.rn.2	LOC100910792; LOC102554588	-4.51	1.44e-08	1.01e-05
TC0100002362.rn.2	Adm	-4.5	0.0004	0.0042
TC1400001578.rn.2	Tmprss11f	-4.49	0.0038	0.0181
TC0800001028.rn.2	Anxa2	-4.42	1.36e-07	3.62e-05
TC0X00000822.rn.2	Pcdh11x; LOC100910387	-4.41	0.0001	0.0019
TC1900000811.rn.2	Tubb3	-4.37	0.001	0.0073
TC0100005173.rn.2	Cd22	-4.3	7.1e-09	5.31e-06
TC0800002951.rn.2	Gfral	-4.28	1.55e-08	1.06e-05
TC2000001235.rn.2	Mdga1	-4.2	0.0035	0.0172
TC0100007960.rn.2	Gfra1	-4.15	0.0033	0.0163
TC0100007156.rn.2	Tm7sf2	-4.14	0.0006	0.005
TC0100002629.rn.2	Itgal	-4.1	2.54e-05	0.0007
TC0400001971.rn.2	Mgst1	-4.04	7.94e-07	0.0001
TC0200003447.rn.2	Zmat3	-3.93	3e-08	1.65e-05
TC1500001842.rn.2	Spryd7	-3.87	8.58e-07	0.0001
TC0300003698.rn.2	Tspan18	-3.87	9.86e-07	0.0001
TC0300001587.rn.2	Sord	-3.73	2.1e-05	0.0007
TC2000000320.rn.2	Pim1	-3.72	2.8e-06	0.0002
TC0800000550.rn.2	Thy1	-3.72	0.0034	0.0165
TC0700002754.rn.2	Lyz2	-3.72	0.0049	0.0215
TC0100005310.rn.2	Siglec5	-3.71	4.84e-08	1.96e-05
TC1300001097.rn.2	Cd34	-3.7	3.94e-09	3.38e-06
TC0900000962.rn.2	Kcne4	-3.7	0.0004	0.0042
TC1300001421.rn.2	Ren	-3.66	1.2e-07	3.38e-05
TC0500002172.rn.2	Prex2	-3.59	0.0001	0.0017
TC1000003621.rn.2	Pdk2	-3.58	1.22e-07	3.41e-05
TC0X00002685.rn.2	Dmd	-3.57	4.61e-07	7.86e-05
TC0200002132.rn.2	Ndst4	-3.57	9.76e-06	0.0004
TC0400002994.rn.2	Snca	-3.55	0.0031	0.0156
TC0900002127.rn.2	Idh1	-3.52	6.23e-05	0.0013
TC0500002504.rn.2	Mob3b	-3.5	7.75e-06	0.0004
TC0100004994.rn.2	Lipe	-3.49	2.67e-08	1.55e-05
TC0900002266.rn.2	Ptprn	-3.49	0.0002	0.0029
TC0900001664.rn.2	Tnfrsf21	-3.44	6.55e-06	0.0004
TC1600001916.rn.2	Slc20a2	-3.44	7.65e-06	0.0004
TC0300004191.rn.2	Siglec1	-3.44	9.11e-06	0.0004
TC0100001544.rn.2	Nav2	-3.42	4.66e-05	0.0011
TC0800001564.rn.2	Ucn2	-3.41	0.0002	0.0022
TC0100005384.rn.2	Cd37	-3.37	0.0018	0.0108
TC0100006415.rn.2	Dkk3	-3.36	7.53e-06	0.0004
TC0200004444.rn.2	Csf1	-3.35	6.53e-08	2.18e-05
TC0900001164.rn.2	Dusp28	-3.33	2.27e-07	5.02e-05
TC0800000061.rn.2	Trpc6	-3.29	4.55e-07	7.83e-05
TC1700000905.rn.2	Akr1c19	-3.27	0.0002	0.0029
TC1200000587.rn.2	Eif2b1	-3.24	1.29e-07	3.49e-05
TC1500002429.rn.2	Dock9	-3.24	5.05e-06	0.0003
TC2000000511.rn.2	Bicc1	-3.17	1.04e-05	0.0005
TC0100006437.rn.2	Rras2	-3.16	1.58e-05	0.0006
TC0900002347.rn.2	Slc19a3	-3.14	4.55e-07	7.83e-05
TC0100006143.rn.2	Plekhb1	-3.13	1.93e-07	4.57e-05
TC0100002383.rn.2	Mical2	-3.13	9.86e-06	0.0004
TC0100001648.rn.2	Ndn	-3.13	1.39e-05	0.0005
TSUnmapped00000080.rn.2	Mmp28	-3.12	5.73e-05	0.0012
TC0300003989.rn.2	Rpap1	-3.09	1.68e-06	0.0002
TC1000000412.rn.2	Atp10b	-3.07	1.81e-05	0.0006
TC0200004707.rn.2	Sgms2	-3.07	3.86e-05	0.001
TC0900001440.rn.2	Adgre1	-3.03	0.0005	0.0044
TC1700000506.rn.2	Serpinb1a	-3.02	0.0011	0.0077
TC0200001936.rn.2	Adora3; LOC100363178; LOC100911796	-3.01	3.6e-07	6.87e-05
TC0800001247.rn.2	Mrap2	-3.01	0.0022	0.0123
TC1900000036.rn.2	Cdh11	-3	9.61e-06	0.0004
TC0700002651.rn.2	Syt1	-2.98	0.01	0.036
TC0100003024.rn.2	B3gnt1	-2.96	8.21e-06	0.0004
TC0100002184.rn.2	Stim1	-2.95	1.05e-07	3.02e-05
TC0600001107.rn.2	Smoc1	-2.95	0.0037	0.0179
TC0800003355.rn.2	Slc38a3	-2.94	2.79e-05	0.0008
TC0700000335.rn.2	Cd320	-2.92	1.05e-05	0.0005
TC0100001649.rn.2	Magel2	-2.91	1.2e-05	0.0005
TC0X00000364.rn.2	Ppef1	-2.89	4.98e-05	0.0011
TC0800003492.rn.2	Cmtm8	-2.89	0.0008	0.0062
TC1000001188.rn.2	Rab11fip4	-2.87	6.99e-05	0.0013
TC0100005746.rn.2	Nr2f2	-2.85	3.39e-06	0.0003
TC0900002123.rn.2	Crygd	-2.85	0.0136	0.0445
TC0400001198.rn.2	Reg1a	-2.84	3.24e-07	6.26e-05
TC1100001703.rn.2	Sema5b	-2.83	1.1e-06	0.0001
TC0800001961.rn.2	Panx1	-2.83	4.81e-06	0.0003
TC1900001652.rn.2	Chmp1a	-2.82	5.91e-08	2.08e-05
TC0500000046.rn.2	Rbpjl2	-2.82	2.29e-06	0.0002
TC1800000754.rn.2	Mc5r	-2.82	8.93e-06	0.0004
TC0800003160.rn.2	Pls1	-2.82	0.0003	0.0032
TC0100007443.rn.2	Pip5k1b	-2.8	7.84e-07	0.0001
TC0900002233.rn.2	Tns1	-2.8	0.0001	0.0017
TC1700000281.rn.2	Card19	-2.78	4.5e-05	0.001
TC1300001317.rn.2	Nckap5	-2.78	0.0002	0.0029
TC0600001949.rn.2	Rasgrp3	-2.78	0.001	0.0074
TC0500004221.rn.2	B3galt6	-2.76	4.02e-08	1.74e-05
TC2000000644.rn.2	Sowahc	-2.76	1.99e-06	0.0002
TC2000000249.rn.2	Cdkn1a	-2.76	0.0002	0.0025
TC1900001347.rn.2	Tppp3	-2.75	6.88e-05	0.0013
TC0900001261.rn.2	Man2a1	-2.74	2.48e-06	0.0002
TC0100003737.rn.2	Mfsd13a	-2.74	1.3e-05	0.0005
TC1800001493.rn.2	Smim3	-2.74	3.84e-05	0.001
TC1300001335.rn.2	Tmem163	-2.74	0.0001	0.002
TC1800000347.rn.2	Pcdhb22	-2.73	2.29e-06	0.0002
TC1600000539.rn.2	Wwc2	-2.73	2.6e-05	0.0008
TC0200000780.rn.2	Pmp2	-2.73	0.0008	0.0062
TC0300002119.rn.2	Acss2	-2.7	0.0004	0.0043
TC0200004911.rn.2	LOC365985; Ak5	-2.69	4.79e-07	8.05e-05
TC0300000677.rn.2	Gca	-2.69	0.0016	0.0098
TC0300002007.rn.2	Sdcbp2	-2.68	1.29e-06	0.0001
TC0600000790.rn.2	Fam177a1	-2.68	2.24e-06	0.0002
TC0800000745.rn.2	Chrna5	-2.68	5.56e-06	0.0003
TC0700003761.rn.2	Pus7l	-2.68	0.0011	0.008
TC1400000472.rn.2	Gabrg1	-2.67	7.53e-08	2.36e-05
TC0100005253.rn.2	Zfp536	-2.66	0.0104	0.0368
TC0100004090.rn.2	Slc35d3	-2.65	0.0002	0.0022
TC0600002401.rn.2	Stxbp6	-2.63	1.47e-06	0.0002
TC2000000413.rn.2	Fam207a	-2.63	4.87e-06	0.0003
TC0100004388.rn.2	Cnksr3	-2.63	1.53e-05	0.0005
TC0800002365.rn.2	Tecta	-2.63	2.45e-05	0.0007
TC0300004013.rn.2	Ttbk2	-2.63	3.09e-05	0.0008
TC1500002484.rn.2	Npm2	-2.62	1.37e-06	0.0002
TC0300003233.rn.2	Scn7a	-2.62	2.3e-05	0.0007
TSUnmapped00000139.rn.2	Elovl6	-2.61	9.41e-08	2.8e-05
TC0100006404.rn.2	Lyve1	-2.61	1.43e-07	3.78e-05
TC0100002285.rn.2	Ilk	-2.61	2.24e-06	0.0002
TC1500001714.rn.2	Tm9sf1	-2.61	4.95e-06	0.0003
TC0300000928.rn.2	Itga4	-2.61	0.0012	0.0083
TC0700000249.rn.2	Olr1086	-2.6	3.94e-08	1.74e-05
TC1000002378.rn.2	Pdpk1	-2.6	1.71e-06	0.0002
TC1600001277.rn.2	Ccser2	-2.6	3.35e-06	0.0003
TC0100006114.rn.2	Serpinh1	-2.6	1.44e-05	0.0005
TC0300004844.rn.2	Kcng1	-2.59	1.56e-07	3.92e-05
TC2000001267.rn.2	Sik1	-2.59	7.22e-07	0.0001
TC0200000960.rn.2	Usp13	-2.59	1.22e-05	0.0005
TC1900001424.rn.2	Zfp612	-2.59	1.4e-05	0.0005
TC0900000344.rn.2	Paqr8	-2.57	3.11e-07	6.22e-05
TC0100002824.rn.2	Inpp5a	-2.57	1.12e-06	0.0001
TC1000000673.rn.2	LOC24906	-2.57	2.29e-06	0.0002
TC0500003427.rn.2	Hpdl	-2.57	3.45e-05	0.0009
TC0300001284.rn.2	Elf5	-2.56	1.76e-05	0.0006
TC1000002110.rn.2	Narf	-2.56	3.88e-05	0.001
TC0300001892.rn.2	Scp2d1	-2.56	4.05e-05	0.001
TC0100007594.rn.2	Lipa	-2.55	8.97e-06	0.0004
TC0800002633.rn.2	Mpi	-2.55	1.28e-05	0.0005
TC1800001241.rn.2	Lrrtm2	-2.54	0.0001	0.0021
TC0100006148.rn.2	P2ry6	-2.54	0.001	0.0073
TC1500001801.rn.2	RGD1563302	-2.53	2.26e-05	0.0007
TC0600001380.rn.2	Tmem251	-2.53	4.09e-05	0.001
TC0500001458.rn.2	Csf3r	-2.53	4.46e-05	0.001
TC1400002190.rn.2	Ddx56	-2.52	2.26e-07	5.02e-05
TC1400000805.rn.2	Sh3tc1	-2.52	5.95e-06	0.0003
TC1100001784.rn.2	Bdh1	-2.52	8.14e-06	0.0004
TC0300004073.rn.2	Fbn1	-2.52	0.0004	0.0038
TC0800002323.rn.2	AW551984; RGD1311744; ENSRNOG00000005960	-2.52	0.0005	0.0049
TC1000001153.rn.2	Rab34	-2.51	3.21e-05	0.0009
TC0200000926.rn.2	Slc7a14	-2.51	0.011	0.0384
TC0700001519.rn.2	Ccdc134	-2.5	5.75e-07	8.98e-05
TC1000003304.rn.2	Nxn	-2.5	2.52e-06	0.0002
TC0300003583.rn.2	Olr666	-2.5	4.36e-06	0.0003
TC1600001408.rn.2	Cers1; Gdf1	-2.5	1.37e-05	0.0005
TC1300001685.rn.2	Qsox1	-2.5	9.76e-05	0.0016
TC0800000239.rn.2	Ldlr	-2.5	0.0002	0.0028
TC0900001871.rn.2	Lonrf2	-2.49	2.85e-06	0.0002
TC0100003708.rn.2	Btrc	-2.49	5.99e-06	0.0003
TC0100005256.rn.2	LOC102550094; Zfp536	-2.49	7.82e-05	0.0014
TC0900000814.rn.2	Crygf	-2.48	4.24e-07	7.67e-05
TC0500003752.rn.2	Med18	-2.48	5.9e-07	9.06e-05
TC0300003171.rn.2	Cd302	-2.48	0.0004	0.004
TC0600002441.rn.2	Dtd2	-2.47	4.42e-06	0.0003
TC0100002660.rn.2	Hsd3b7	-2.47	4.49e-06	0.0003
TC0100005272.rn.2	Plekhf1	-2.46	7.9e-06	0.0004
TC0200000916.rn.2	LOC100910010	-2.46	0.0001	0.0021
TC1600000348.rn.2	Csgalnact1	-2.46	0.0142	0.046
TC1700000290.rn.2	Ptpdc1	-2.45	1.23e-06	0.0001
TC0100007003.rn.2	Cdkn1c	-2.44	1.02e-05	0.0004
TC0600003049.rn.2	Itpk1	-2.43	2.08e-07	4.69e-05
TC0200002806.rn.2	LOC100910041	-2.43	2.6e-06	0.0002
TC0600003053.rn.2	Moap1	-2.43	5.37e-06	0.0003
TC0900000125.rn.2	LOC685976; LOC102556298	-2.43	0.0002	0.0028
TC0200003247.rn.2	Pcsk1	-2.43	0.0096	0.0348
TC0X00000677.rn.2	Chic1	-2.42	5.34e-06	0.0003
TC0X00002282.rn.2	Chrdl1	-2.42	0.0004	0.0043
TC1000003671.rn.2	Pnpo	-2.41	3.94e-07	7.36e-05
TC0700001487.rn.2	Srek1ip1	-2.41	3.22e-06	0.0003
TC0300000572.rn.2	Tnfaip6	-2.41	9.62e-06	0.0004
TC1000000487.rn.2	Olr1393	-2.41	0.0005	0.0044
TC1300000748.rn.2	Fcgr3a	-2.41	0.0006	0.0054
TC0300004755.rn.2	Tnnc2	-2.4	1.57e-06	0.0002
TC0400003885.rn.2	LOC502908	-2.4	4.6e-06	0.0003
TC1500001288.rn.2	Nid2	-2.4	5.23e-06	0.0003
TC0200004329.rn.2	Cd2	-2.4	5.27e-05	0.0011
TC1100002012.rn.2	Snap29	-2.39	4.52e-07	7.83e-05
TC1400000192.rn.2	Rasgef1b	-2.39	1.19e-05	0.0005
TC0300003616.rn.2	Olr720	-2.39	1.24e-05	0.0005
TC0700000755.rn.2	Lyc2	-2.39	0.0112	0.0388
TC0200004131.rn.2	Ivl	-2.38	2.6e-06	0.0002
TC0300002816.rn.2	Ccbl1	-2.37	2.75e-06	0.0002
TC0100001805.rn.2	Agbl1	-2.37	2.88e-05	0.0008
TC1900000319.rn.2	RGD1306072	-2.37	3.05e-05	0.0008
TC0700001029.rn.2	Zfpm2	-2.36	1.77e-05	0.0006
TC0100007593.rn.2	Ch25h	-2.36	0.0001	0.002
TC0400002718.rn.2	LOC688922; LOC100909424	-2.36	0.0002	0.0029
TC0100005209.rn.2	Chst8	-2.35	1.17e-06	0.0001
TC2000000782.rn.2	Marcks; LOC681252	-2.35	6.74e-06	0.0004
TC0100006927.rn.2	Cend1	-2.35	6.74e-06	0.0004
TC1200000799.rn.2	RGD1560398	-2.35	8.12e-06	0.0004
TC0100001358.rn.2	LOC102548320	-2.35	1.62e-05	0.0006
TC1500000171.rn.2	Fam107a	-2.35	2.37e-05	0.0007
TC1700002373.rn.2	Nid1	-2.35	4.63e-05	0.0011
TC0900000874.rn.2	Igfbp2	-2.35	0.0002	0.0022
TC1500001321.rn.2	Nkiras1	-2.35	0.0013	0.0088
TC1600000746.rn.2	Mak16	-2.34	5.77e-06	0.0003
TC0100005313.rn.2	LOC100912689	-2.34	2.75e-05	0.0008
TSUnmapped00000007.rn.2	Vkorc1l1	-2.34	0.0005	0.0045
TC1000004069.rn.2	LOC102549836	-2.33	4.42e-07	7.83e-05
TC0800002324.rn.2	Olr1314	-2.33	5.46e-06	0.0003
TC0800002327.rn.2	Olr1314	-2.33	5.46e-06	0.0003
TC0100002150.rn.2	Fam168a	-2.33	2.56e-05	0.0007
TC1000001297.rn.2	Bcas3	-2.32	2.16e-06	0.0002
TC0100007815.rn.2	Cuedc2	-2.32	1.17e-05	0.0005
TC1900000819.rn.2	LOC678766	-2.32	1.46e-05	0.0005
TC0100008022.rn.2	Tmem86b	-2.32	2.65e-05	0.0008
TC1700000386.rn.2	Phactr1	-2.32	7.69e-05	0.0014
TC1400000210.rn.2	Paqr3	-2.32	0.0001	0.0021
TC0X00001687.rn.2	Adgrg2	-2.32	0.0003	0.0034
TC1400000248.rn.2	Ccdc158	-2.32	0.0006	0.0052
TC0X00002281.rn.2	Ammecr1	-2.31	0.0025	0.0134
TC1000004081.rn.2	Sdk2	-2.31	0.0138	0.045
TC1900000140.rn.2	Hmgxb4	-2.3	2.6e-07	5.64e-05
TC0100001531.rn.2	Vom1r70	-2.3	4.04e-06	0.0003
TC1300001747.rn.2	Dars2	-2.3	6.27e-06	0.0004
TC0800002345.rn.2	RGD1309108	-2.3	0.0001	0.0017
TC0200002906.rn.2	Skiv2l2	-2.29	3.14e-07	6.22e-05
TC1600000969.rn.2	LOC688801	-2.29	9.53e-07	0.0001
TC0200002608.rn.2	Spz1	-2.29	2.16e-06	0.0002
TC0100006788.rn.2	Chst15	-2.29	2.78e-06	0.0002
TC1000003234.rn.2	Dph1; Ovca2	-2.29	8.18e-06	0.0004
TC1400001728.rn.2	Grxcr1	-2.29	2.85e-05	0.0008
TC1000003208.rn.2	Olr1496	-2.29	9.41e-05	0.0016
TC1000003251.rn.2	Olr1496	-2.29	9.41e-05	0.0016
TC1100001389.rn.2	Dscam; LOC100360483	-2.29	0.0004	0.0042
TC0200001409.rn.2	Fstl5	-2.29	0.0028	0.0145
TC1500002140.rn.2	Rgcc	-2.28	7.83e-07	0.0001
TC0100001055.rn.2	Ceacam10	-2.28	9.46e-06	0.0004
TC1600001636.rn.2	Enpp6	-2.28	1.4e-05	0.0005
TC0700002817.rn.2	Tbc1d30	-2.28	1.57e-05	0.0006
TC0200003970.rn.2	Fbxw7	-2.28	0.0003	0.0032
TC1800000052.rn.2	Impact	-2.28	0.0028	0.0147
TC0700003899.rn.2	LOC100362820	-2.27	1.39e-06	0.0002
TC0200003952.rn.2	Tlr2	-2.27	1.5e-06	0.0002
TCUn_KL568208v100000001.rn.2	Acadsb	-2.27	1.63e-06	0.0002
TC1000001904.rn.2	Dnai2	-2.27	0.0001	0.0021
TC1900000570.rn.2	Chst4	-2.27	0.0022	0.0125
TC0100004554.rn.2	Dact2	-2.26	1.55e-06	0.0002
TC1000003686.rn.2	Srcin1	-2.26	6.36e-05	0.0013
TC1800001632.rn.2	RGD1562758	-2.26	0.0009	0.007
TC0200001277.rn.2	LOC100912172	-2.25	6.24e-07	9.52e-05
TC1200001745.rn.2	Triap1	-2.25	3.74e-06	0.0003
TC0300002819.rn.2	Sh3glb2	-2.25	4.55e-06	0.0003
TC1800000623.rn.2	Pdgfrb	-2.25	4.71e-06	0.0003
TC0100005716.rn.2	Lrrc28	-2.25	8.45e-06	0.0004
TC1800000465.rn.2	LOC317165	-2.25	2.6e-05	0.0008
TC0200001048.rn.2	Abhd18	-2.25	4.44e-05	0.001
TC0100007375.rn.2	Rfk	-2.25	8.3e-05	0.0015
TC0900000674.rn.2	Plcl1	-2.25	0.0001	0.0021
TC1000001026.rn.2	Trpv3	-2.25	0.0004	0.0038
TC1700001978.rn.2	Idi1	-2.25	0.0009	0.0065
TC0X00000717.rn.2	Pgk1	-2.25	0.0068	0.0274
TC1000000226.rn.2	Igfals	-2.24	4.53e-07	7.83e-05
TC0400003210.rn.2	Spr	-2.24	9.17e-06	0.0004
TC0700000726.rn.2	Ptprr	-2.24	4.23e-05	0.001
TC0100006740.rn.2	NONMMUG039405	-2.24	0.0001	0.0019
TC0800001546.rn.2	Lamb2	-2.24	0.0002	0.0025
TC1400000857.rn.2	Spon2; LOC100910790	-2.24	0.0002	0.0029
TC0900001514.rn.2	Oard1	-2.23	2.52e-07	5.51e-05
TC0300002571.rn.2	Col9a3	-2.23	1.06e-06	0.0001
TC1400001734.rn.2	Shisa3	-2.23	9.75e-06	0.0004
TC1900000142.rn.2	LOC100359681	-2.23	2.72e-05	0.0008
TC0700002650.rn.2	LOC102550148	-2.23	0.0003	0.0031
TC0900002193.rn.2	Fn1	-2.23	0.0004	0.0043
TC1800001521.rn.2	Arhgef37	-2.23	0.0012	0.0082
TC0300001374.rn.2	Lgr4	-2.23	0.0022	0.0122
TC1300001874.rn.2	Hsd17b7	-2.22	3.84e-05	0.001
TC1000001903.rn.2	Ttyh2	-2.22	0.0002	0.0022
TC1000002300.rn.2	4930562C15Rik; LOC100361104	-2.21	2.06e-07	4.69e-05
TC1000003020.rn.2	Map2k4	-2.21	5.04e-07	8.36e-05
TC0200003937.rn.2	Rbm46	-2.21	1.11e-06	0.0001
TC0300001616.rn.2	Sema6d	-2.21	4.77e-05	0.0011
TC1400000824.rn.2	Tnip2	-2.21	7.76e-05	0.0014
TC1100001287.rn.2	Urb1	-2.21	0.0001	0.0019
TC1700002383.rn.2	Kif27	-2.21	0.0003	0.0031
TC1800001867.rn.2	Prrc1	-2.2	1.08e-06	0.0001
TC0100001298.rn.2	Wdr62	-2.2	1.25e-06	0.0001
TC0400001465.rn.2	Arl6ip5	-2.2	3.49e-06	0.0003
TC0X00001375.rn.2	LOC100911510	-2.2	3.65e-05	0.0009
TC0100007545.rn.2	Prkg1	-2.2	3.83e-05	0.001
TC0200003049.rn.2	Slc1a3	-2.2	9.68e-05	0.0016
TC1000002658.rn.2	Sgcd	-2.2	0.0002	0.0025
TC0100005735.rn.2	Arrdc4	-2.2	0.0003	0.0032
TC0100003104.rn.2	Map4k2	-2.19	8.67e-07	0.0001
TC0400000835.rn.2	Zfp212	-2.19	3.07e-06	0.0002
TC1600000889.rn.2	Defb39	-2.19	4.69e-06	0.0003
TC0400001998.rn.2	Slco1c1	-2.19	3.41e-05	0.0009
TC1000001157.rn.2	Sdf2	-2.19	7.75e-05	0.0014
TC0100005090.rn.2	Nfkbib	-2.19	8.12e-05	0.0015
TC0700000022.rn.2	Gls2	-2.19	0.0002	0.0028
TC1800001310.rn.2	Pcdh1	-2.19	0.0012	0.0083
TC0100001097.rn.2	Cyp2b3	-2.18	3.35e-06	0.0003
TC0600000620.rn.2	Agr3	-2.18	3.64e-06	0.0003
TC0400002271.rn.2	Cacna2d1	-2.18	4.85e-06	0.0003
TC0600000333.rn.2	RGD1565766	-2.18	1e-05	0.0004
TC0700001144.rn.2	Zhx2	-2.18	1.64e-05	0.0006
TC0200002467.rn.2	Rpe65	-2.18	7.33e-05	0.0014
TC0800002206.rn.2	LOC102555390; Kirrel3	-2.18	8.31e-05	0.0015
TC1800001333.rn.2	Mcc	-2.18	0.0002	0.0027
TC0700001710.rn.2	Irak4	-2.18	0.0005	0.0045
TC1200001606.rn.2	LOC100911975; P2rx7	-2.18	0.0005	0.0049
TC0100002432.rn.2	Calcb	-2.18	0.0008	0.0064
TCUn_KL568414v100000006.rn.2	Mmp28	-2.18	0.0018	0.0108
TC1500000778.rn.2	Hr	-2.17	1.37e-05	0.0005
TC1200001747.rn.2	Triap1	-2.17	9.69e-05	0.0016
TC0800001381.rn.2	Dzip1l	-2.17	0.0005	0.0046
TC0600001012.rn.2	Hspa2	-2.17	0.0014	0.0092
TC0400002291.rn.2	Sema3e	-2.17	0.0054	0.0233
TC0500001955.rn.2	Slc2a5	-2.16	4.97e-06	0.0003
TC1600001206.rn.2	LOC680885	-2.16	8.63e-06	0.0004
TC0100000874.rn.2	LOC365182	-2.16	2.8e-05	0.0008
TC0800003560.rn.2	Cx3cr1	-2.16	5.31e-05	0.0011
TC1700001673.rn.2	Wrnip1	-2.16	0.0001	0.0019
TC1300000444.rn.2	Ptgs2	-2.16	0.0001	0.002
TC1300001967.rn.2	Fcer1a	-2.16	0.0009	0.0067
TC0200001045.rn.2	Hspa4l	-2.16	0.0094	0.0343
TC0800001590.rn.2	Elp6	-2.15	5.36e-07	8.68e-05
TC0300000256.rn.2	Ptges2	-2.15	6.22e-06	0.0004
TC0100002979.rn.2	RGD1311946	-2.15	1.04e-05	0.0005
TC0100000560.rn.2	Rnaset2	-2.15	4.93e-05	0.0011
TC0700004052.rn.2	March2	-2.15	4.94e-05	0.0011
TC0X00001254.rn.2	Nsdhl	-2.15	5.8e-05	0.0012
TC0100007950.rn.2	Ccdc186; ENSRNOG00000017018	-2.14	4.03e-06	0.0003
TC0400001462.rn.2	Fam19a4	-2.14	4.09e-06	0.0003
TC0500001551.rn.2	Col16a1	-2.14	9.67e-05	0.0016
TC0100000639.rn.2	Vom1r8; Vom1r6	-2.14	0.0013	0.0087
TC0100001528.rn.2	Ldha	-2.14	0.0028	0.0146
TC1000000510.rn.2	Rasgef1c	-2.14	0.0051	0.0222
TC0400002927.rn.2	Tril	-2.14	0.008	0.0307
TC1700000501.rn.2	Serpinb9d	-2.13	1.15e-05	0.0005
TC1000001130.rn.2	Fam57a	-2.13	4.54e-05	0.001
TC0300001653.rn.2	Blvra	-2.13	8.47e-05	0.0015
TC0700003966.rn.2	Csad	-2.13	0.0004	0.0039
TC0100001169.rn.2	Selv	-2.12	3.62e-07	6.87e-05
TC0100003249.rn.2	LOC691074	-2.12	6.62e-06	0.0004
TC0100005420.rn.2	Abcc8	-2.12	4.61e-05	0.0011
TC0100002433.rn.2	Insc	-2.12	0.0005	0.0049
TC1200001365.rn.2	Wbscr27	-2.12	0.0013	0.0087
TC0100003850.rn.2	Tcf7l2	-2.11	3.15e-06	0.0003
TC0200004465.rn.2	Sypl2	-2.11	1.2e-05	0.0005
TC0300001409.rn.2	Olr796; Olr795	-2.11	7.34e-05	0.0014
TC0500001597.rn.2	Taf12	-2.1	2.85e-06	0.0002
TC0200004982.rn.2	Pglyrp4	-2.1	3.74e-06	0.0003
TC1800000391.rn.2	Pabpc2	-2.1	5.26e-06	0.0003
TC0400001679.rn.2	Ninj2	-2.1	5.3e-06	0.0003
TC1200000847.rn.2	Sez6l	-2.1	6.01e-06	0.0003
TC0200005008.rn.2	Amy2a3; AMY2A3; LOC100911494	-2.1	6.83e-06	0.0004
TC0100001070.rn.2	Cic	-2.1	8.34e-06	0.0004
TC0100003267.rn.2	Olr339	-2.1	4.81e-05	0.0011
TC0100007372.rn.2	Vps13a	-2.1	0.0001	0.0017
TC1400002473.rn.2	RGD1560273; ENSRNOG00000009121	-2.1	0.0007	0.0059
TC0600000631.rn.2	Ispd	-2.1	0.0011	0.0077
TC1700000070.rn.2	Isca1	-2.09	2.22e-06	0.0002
TC1600000049.rn.2	Fam213a	-2.09	3.77e-06	0.0003
TC0900000239.rn.2	Rsph9	-2.09	3.9e-06	0.0003
TC1200000192.rn.2	Smurf1	-2.09	5.08e-06	0.0003
TC1300000243.rn.2	Slc41a1	-2.09	1.25e-05	0.0005
TC0X00002274.rn.2	Acsl4	-2.09	0.0003	0.0035
TC1400000855.rn.2	Spon2	-2.09	0.0004	0.0043
TC1400002000.rn.2	LOC679766	-2.09	0.0006	0.005
TC0500001900.rn.2	Mthfr	-2.09	0.0006	0.0054
TC0X00000278.rn.2	Tlr7	-2.09	0.0018	0.0108
TC0100007338.rn.2	RGD1561986	-2.09	0.0019	0.0112
TC0800003644.rn.2	Cnn1	-2.09	0.0049	0.0217
TCUn_KL568432v100000001.rn.2	Pcsk1	-2.09	0.0102	0.0364
TC1400001538.rn.2	Enam	-2.08	2.01e-06	0.0002
TC1400000171.rn.2	Hpse	-2.08	3.85e-06	0.0003
TC0100005652.rn.2	Peg12	-2.08	4.07e-06	0.0003
TC1600001467.rn.2	Naf1	-2.08	4.6e-06	0.0003
TC0800000228.rn.2	Slc44a2	-2.08	5.16e-06	0.0003
TC0400002571.rn.2	Pax4	-2.08	1.42e-05	0.0005
TC1700002258.rn.2	Hacd1	-2.08	3.58e-05	0.0009
TC1000003413.rn.2	Rffl	-2.08	4.25e-05	0.001
TC0500001734.rn.2	Ece1	-2.08	0.0005	0.0047
TC2000000402.rn.2	Trpm2	-2.08	0.0007	0.0059
TC0100005191.rn.2	Scgb2b24	-2.08	0.0072	0.0284
TC0200003887.rn.2	Serpini2	-2.07	8.8e-06	0.0004
TC0500004094.rn.2	Spsb1	-2.07	1.17e-05	0.0005
TC0500001847.rn.2	LOC102553988; Kazn	-2.07	2.28e-05	0.0007
TC0400001678.rn.2	Ninj2	-2.07	3.11e-05	0.0008
TC0200000309.rn.2	LOC100910111	-2.07	0.0002	0.0025
TC0200000430.rn.2	LOC100910416	-2.07	0.0002	0.0025
TC0200000431.rn.2	LOC100910448	-2.07	0.0002	0.0025
TC0200000432.rn.2	LOC100910476	-2.07	0.0002	0.0025
TC0800000474.rn.2	LOC100909882; Olr1265	-2.07	0.0002	0.0025
TSUnmapped00000226.rn.2	Olr1265	-2.07	0.0002	0.0025
TC2000001505.rn.2	Oit3	-2.07	0.0002	0.0027
TC0400000004.rn.2	Insig1	-2.07	0.0005	0.0045
TC1600000804.rn.2	Pomk	-2.07	0.0005	0.0045
TC1400002086.rn.2	Grk4	-2.06	1.24e-05	0.0005
TC0300001124.rn.2	Rapsn	-2.06	2.09e-05	0.0007
TC0300001411.rn.2	Lpcat4	-2.06	4.12e-05	0.001
TC0800001790.rn.2	Klhl40	-2.06	5.03e-05	0.0011
TC0200001459.rn.2	Fgg	-2.06	6.38e-05	0.0013
TC1600000920.rn.2	Csmd1	-2.06	0.0012	0.0082
TC0200003106.rn.2	Cdh6	-2.06	0.002	0.0117
TC1700001057.rn.2	Slc39a12	-2.06	0.0076	0.0297
TC0X00001872.rn.2	LOC685700; LOC102556238	-2.05	7.99e-07	0.0001
TC2000001567.rn.2	Stox1	-2.05	2.55e-06	0.0002
TC0200000669.rn.2	Fam134b	-2.05	1.84e-05	0.0006
TC0400003195.rn.2	Paip2b	-2.05	2.73e-05	0.0008
TC0400002922.rn.2	Jazf1	-2.05	4.8e-05	0.0011
TC0800003346.rn.2	Cyb561d2	-2.05	0.0002	0.0027
TC0800002404.rn.2	Hmbs	-2.05	0.0003	0.003
TC0400000207.rn.2	Sema3e	-2.05	0.0019	0.011
TC0600002919.rn.2	RGD1565693	-2.04	8.17e-07	0.0001
TC1000003085.rn.2	Shbg	-2.04	1.32e-06	0.0001
TC1000003425.rn.2	Gm11435; Heatr9; RGD1559875	-2.04	1.91e-06	0.0002
TC0100001561.rn.2	Nell1	-2.04	2.38e-06	0.0002
TC1500001911.rn.2	Mtmr9	-2.04	4.45e-06	0.0003
TC0100005360.rn.2	Atf5	-2.04	7.08e-06	0.0004
TC1700000431.rn.2	Eef1e1	-2.04	8.49e-06	0.0004
TC0500002241.rn.2	Mos	-2.04	3.13e-05	0.0008
TC0100002491.rn.2	Tmem159	-2.04	3.78e-05	0.001
TC1800000387.rn.2	Spry4	-2.04	0.0001	0.002
TC1000001539.rn.2	Mrpl45	-2.04	0.0002	0.0028
TC0200000046.rn.2	Pou5f2	-2.04	0.0004	0.0041
TC1600000627.rn.2	Mtus1	-2.04	0.0011	0.0078
TC1400000450.rn.2	Cnga1	-2.04	0.0038	0.0179
TC1200000823.rn.2	Cmklr1	-2.04	0.0063	0.026
TC0500003151.rn.2	Plaa	-2.03	3.23e-06	0.0003
TC1000002654.rn.2	Timd2	-2.03	1.13e-05	0.0005
TC0500002007.rn.2	Nphp4	-2.03	1.94e-05	0.0006
TC0800002599.rn.2	Scaper	-2.03	3.27e-05	0.0009
TC0X00000040.rn.2	Fundc1	-2.03	5.16e-05	0.0011
TC0100007246.rn.2	Fen1	-2.03	7.5e-05	0.0014
TC1500002449.rn.2	Tmtc4	-2.03	0.0001	0.0021
TC0300003343.rn.2	Lnp	-2.03	0.0002	0.0022
TC1300000736.rn.2	Sh2d1b2	-2.03	0.0004	0.004
TC1600001715.rn.2	Zdhhc2	-2.03	0.0074	0.0291
TC1700000911.rn.2	Ucn3	-2.02	4.13e-06	0.0003
TC0400003633.rn.2	Ankrd26	-2.02	8.25e-06	0.0004
TC0200001567.rn.2	Fam189b	-2.02	1e-05	0.0004
TC0700000216.rn.2	Sbno2	-2.02	1.51e-05	0.0005
TC1200001753.rn.2	Pop5	-2.02	1.72e-05	0.0006
TC0900001757.rn.2	LOC678760	-2.02	1.78e-05	0.0006
TC0100005343.rn.2	Clec11a	-2.02	6.02e-05	0.0012
TC0100007742.rn.2	Got1	-2.02	9.02e-05	0.0016
TSUnmapped00000215.rn.2	Olr1254	-2.02	9.57e-05	0.0016
TC0100002335.rn.2	Tub	-2.02	0.0001	0.002
TC0900000865.rn.2	Xrcc5	-2.02	0.0002	0.0022
TC0800001146.rn.2	Gclc	-2.02	0.0002	0.0026
TC0700001095.rn.2	Aard	-2.02	0.0005	0.0044
TC1000001488.rn.2	Snf8	-2.02	0.0006	0.0054
TC0300002061.rn.2	Pofut1	-2.02	0.0009	0.0069
TC0800000845.rn.2	Pkm	-2.02	0.0015	0.0095
TC1600000385.rn.2	Klhl2	-2.01	4.3e-06	0.0003
TC0200003084.rn.2	LOC499542	-2.01	2.33e-05	0.0007
TC0100004713.rn.2	Vom2r78; Vom2r32	-2.01	3.03e-05	0.0008
TC1000001907.rn.2	Gpr142	-2.01	0.0001	0.0017
TC0400001054.rn.2	Grid2	-2.01	0.0001	0.002
TC0X00002486.rn.2	Gpc4	-2.01	0.0156	0.0494
TC0400001898.rn.2	RGD1559532; Prp15	-2	6.25e-06	0.0004
TC0X00002270.rn.2	Gucy2f	-2	1.11e-05	0.0005
TC1000000801.rn.2	Pigl	-2	1.25e-05	0.0005
TC0900000594.rn.2	Col3a1	-2	1.84e-05	0.0006
TC0100001160.rn.2	Med29	-2	2.12e-05	0.0007
TC1700000227.rn.2	Sema4d	-2	4.12e-05	0.001
TC1600001875.rn.2	Fgfr1	-2	7.16e-05	0.0014
TC0500003610.rn.2	Ago3	-2	8.69e-05	0.0015
TC0400001597.rn.2	Atg7	-2	0.0001	0.002
TC0300000058.rn.2	Npdc1	-2	0.0002	0.0025
TC1200000889.rn.2	RGD1566091; LOC302022	-2	0.0003	0.0032
Fold change < -2, FDR (false discovery rate) < 0.05, P < 0.05. “−” Indicates downregulation.
